# Supplementary material
Source: publisher figshare collection journal article supplement (https://springernature.figshare.com/ndownloader/files/13524332)
Supplement: Supplementary file 1 [file 13524332]

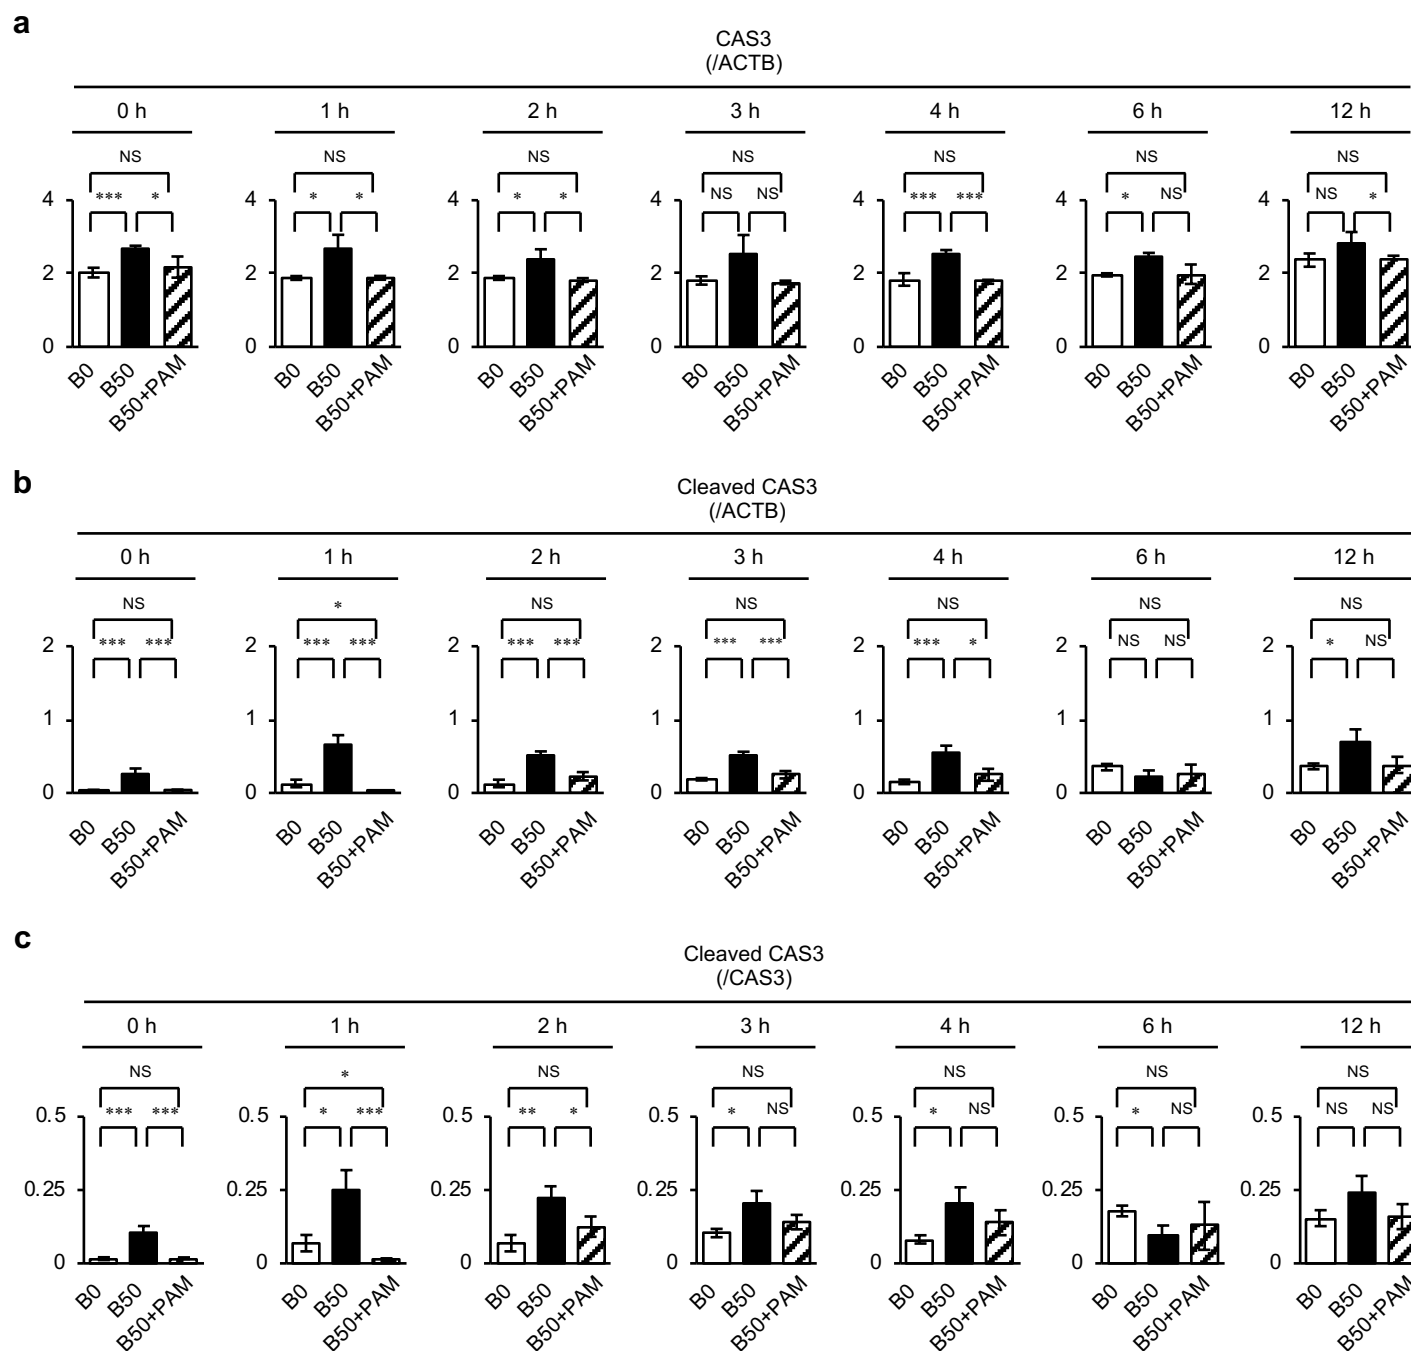

**Supplementary Figure 2. Effects of pamidronate on the kinetics of caspase 3 and cleaved caspase 3 at each time point in bilirubin-impaired SHED.** Sequential expression of caspase 3 (CASP3) and the cleaved caspase 3 (Cleaved CASP3) by western blot analysis were shown in Figure 1e. Results were shown as the relative expression of caspase 3 (CASP3) to beta-actin (ACTB) (a), cleaved caspase 3 (Cleaved CASP3) to beta-actin (b), and cleaved caspase 3 to caspase 3 (c) at each time point among the three groups. B0, SHED treated with 0  $\mu$ M bilirubin; B50, SHED treated with 50  $\mu$ M bilirubin; B50+PAM, SHED treated with 50  $\mu$ M bilirubin and 10  $\mu$ M pamidronate. n = 5 for all groups. Statistical analysis was performed as described in the Methods. Graph bars showed the means  $\pm$  SEM. \* $P$  < 0.05, \*\* $P$  < 0.01, and \*\*\* $P$  < 0.005. NS: no significance.
