# Supplementary material
Source: publisher figshare collection journal article supplement (https://springernature.figshare.com/ndownloader/files/13524332)
Supplement: Supplementary file 2 [file 13524332]

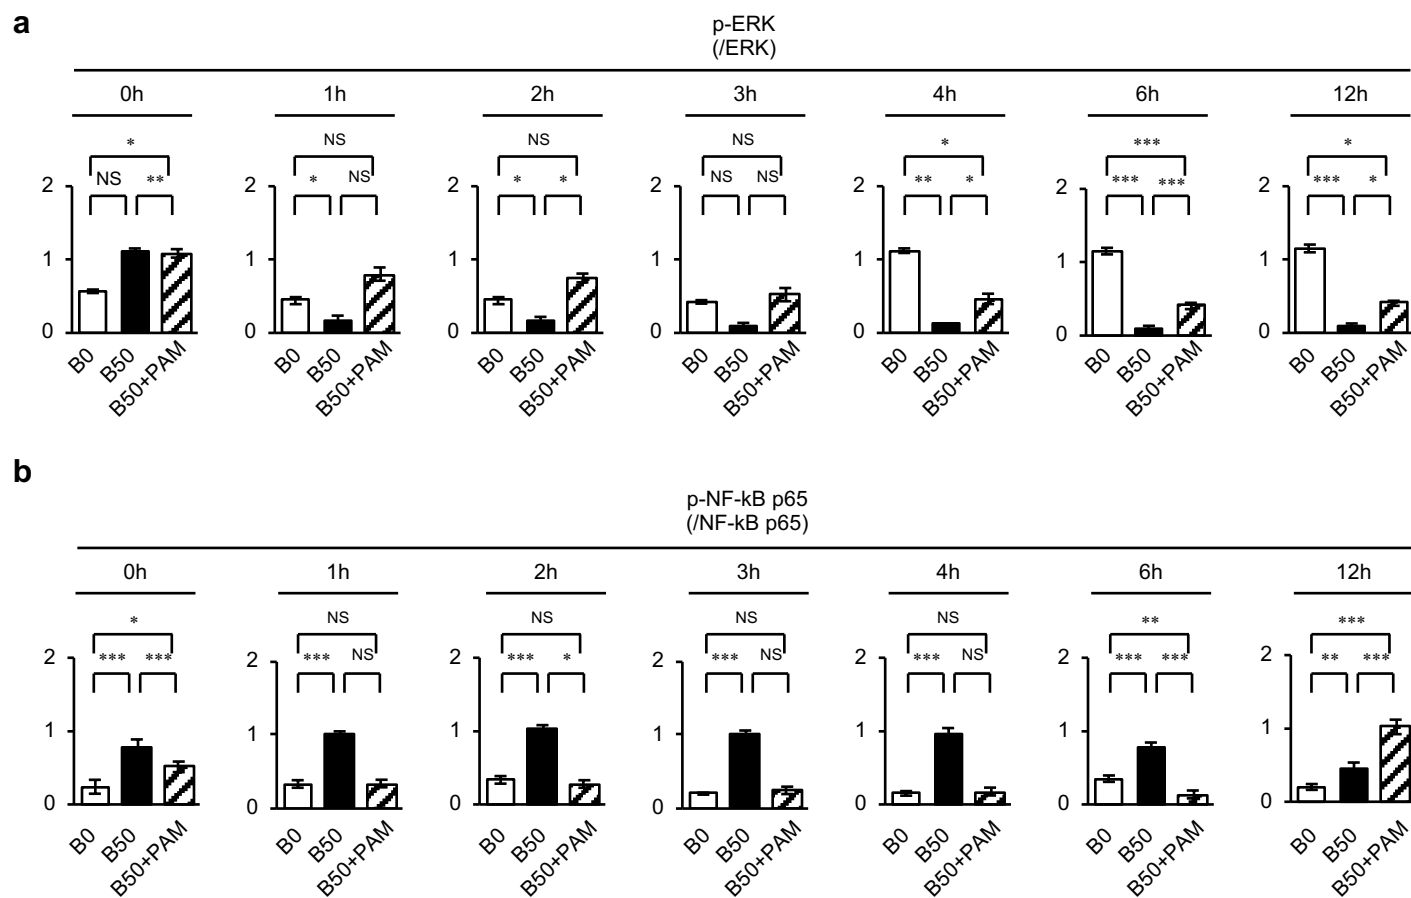

**Supplementary Figure 5. Effects of pamidronate on the kinetics of phosphorylation of ERK and NF-κB at each time point in bilirubin-impaired SHED.** Sequential expression of ERK and NF-κB and their phosphoprotein p-ERK and p-NF-κB p65 by western blot analysis was shown in Figure 3b and 3c. Results were shown as the relative phosphorylated expression of p-ERK1/2 to ERK1/2 (**a**) and p-NF-κB p65 to NF-κB p65 (**b**) at each time point among the three groups. B0, SHED treated with 0 μM bilirubin; B50, SHED treated with 50 μM bilirubin; B50+PAM, SHED treated with 50 μM bilirubin and 10 μM pamidronate. n = 5 for all groups. Statistical analysis was performed as described in the Methods. Graph bars showed the means ± SEM. \**P* < 0.05, \*\**P* < 0.01, and \*\*\**P* < 0.005. NS: no significance.
