# Supplementary material
Source: publisher figshare collection journal article supplement (https://springernature.figshare.com/ndownloader/files/13524332)
Supplement: Supplementary file 3 [file 13524332]

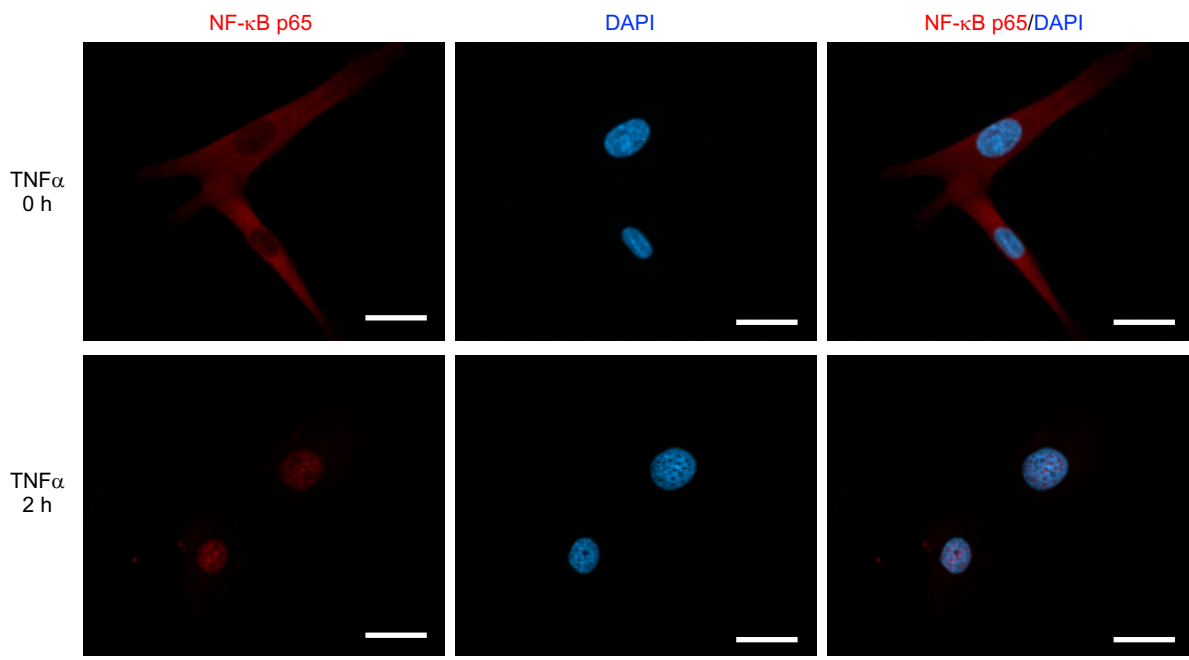

**Supplementary Figure 6. Nuclear translocation of NF-κB p65 in SHED under tumor necrosis factor alpha (TNFα) stimulation.** The cells were stimulated with TNFα (10 nM) under a serum-depleted condition for 2 h. Nuclear translocation of NF-κB p65 in SHED by immunofluorescent microscopy. Nucleus were stained with 4',6-diamidino-2-phenylindole (DAPI). Representative images of the localization of NF-κB p65 in SHED after 0 and 2 h of the stimulation. Bars = 20 μm.
