# Supplementary material
Source: publisher figshare collection journal article supplement (https://springernature.figshare.com/ndownloader/files/13524332)
Supplement: Supplementary file 4 [file 13524332]

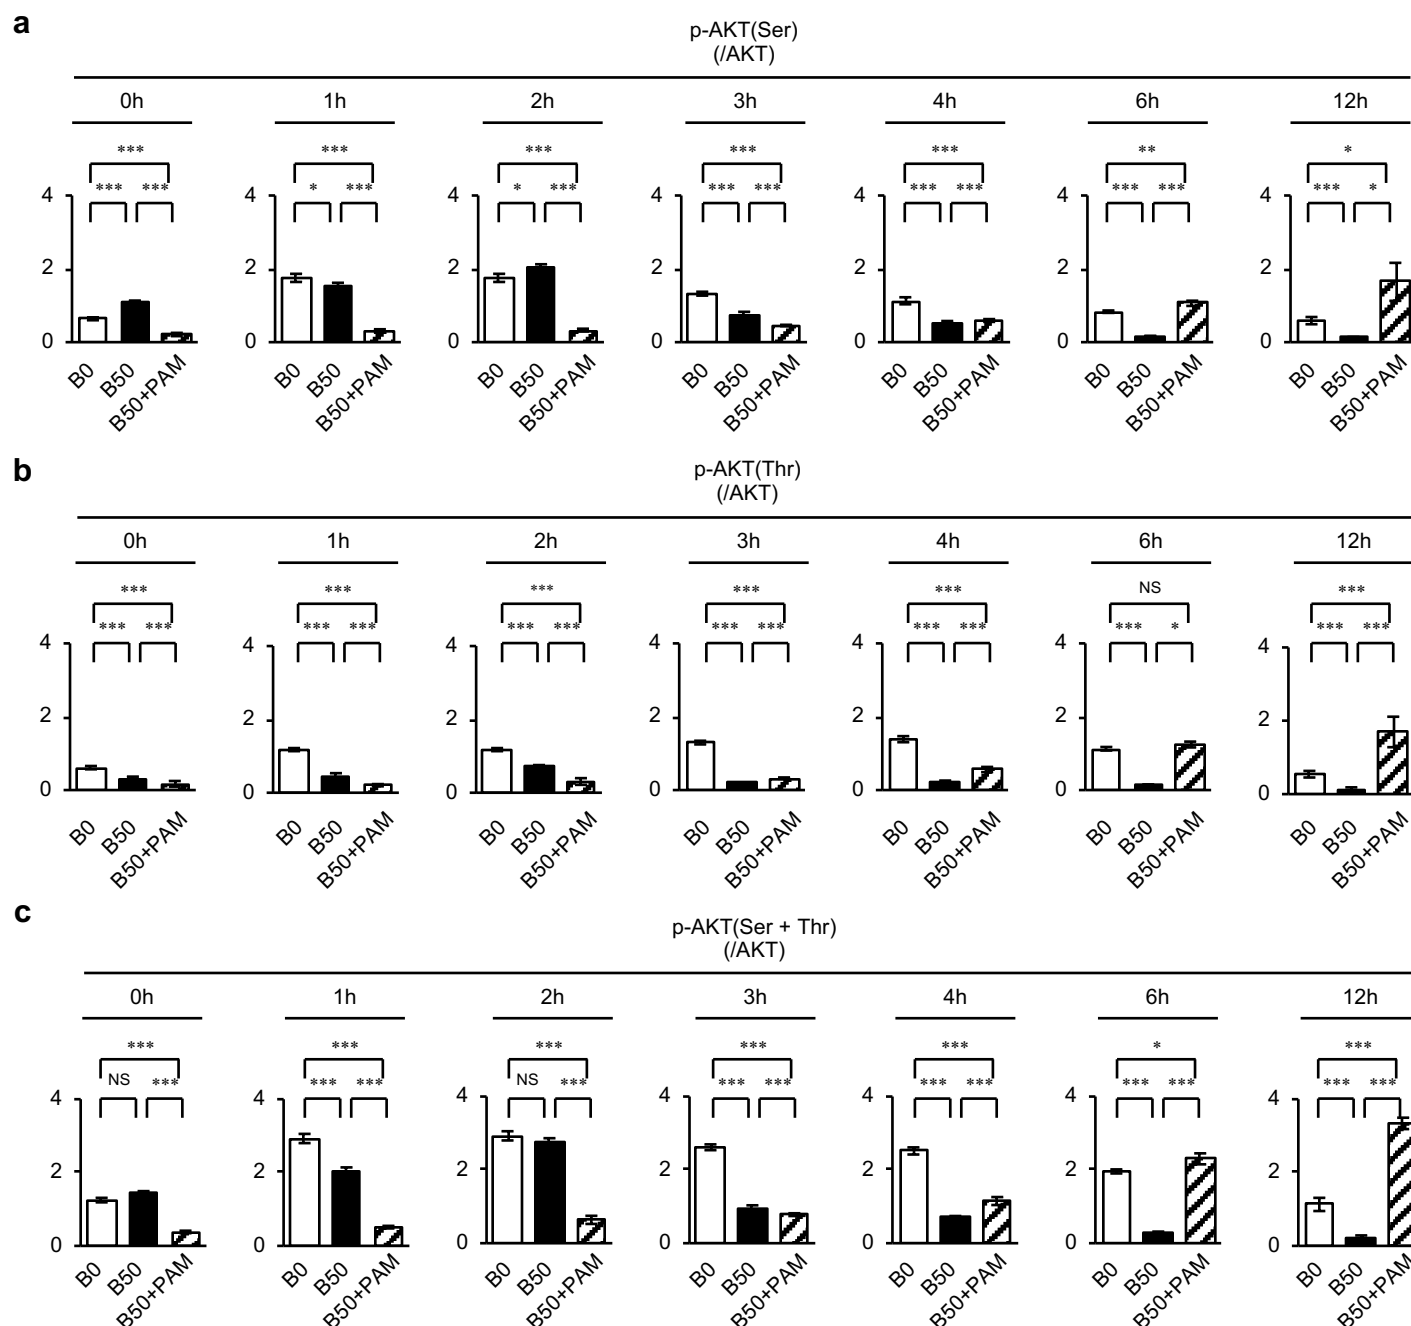

**Supplementary Figure 4. Effects of pamidronate on the kinetics of phosphorylation of AKT at each time point in bilirubin-impaired SHED.** Sequential expression of AKT and its phosphoprotein p-AKT (Ser) and p-AKT (Thr) by western blot analysis was shown in Figure 3a. Results were shown as the relative phosphorylated expression of p-AKT (Ser) (**a**), p-AKT (Thr) (**b**), and p-AKT (Ser) and p-AKT (Thr) [p-AKT (Ser) + p-AKT (Thr)] (**c**) to AKT, p-AKT (Ser)/AKT, p-AKT (Thr)/AKT, and p-AKT (Ser + Thr)/AKT, respectively, at each time point among the three groups. B0, SHED treated with 0  $\mu$ M bilirubin; B50, SHED treated with 50  $\mu$ M bilirubin; B50+PAM, SHED treated with 50  $\mu$ M bilirubin and 10  $\mu$ M pamidronate.  $n = 5$  for all groups. Statistical analysis was performed as described in the Methods. Graph bars showed the means  $\pm$  SEM. \* $P < 0.05$ , \*\* $P < 0.01$  and \*\*\* $P < 0.005$ . NS: no significance.
