# Supplementary material
Source: publisher figshare collection journal article supplement (https://springernature.figshare.com/ndownloader/files/13524332)
Supplement: Supplementary file 6 [file 13524332]

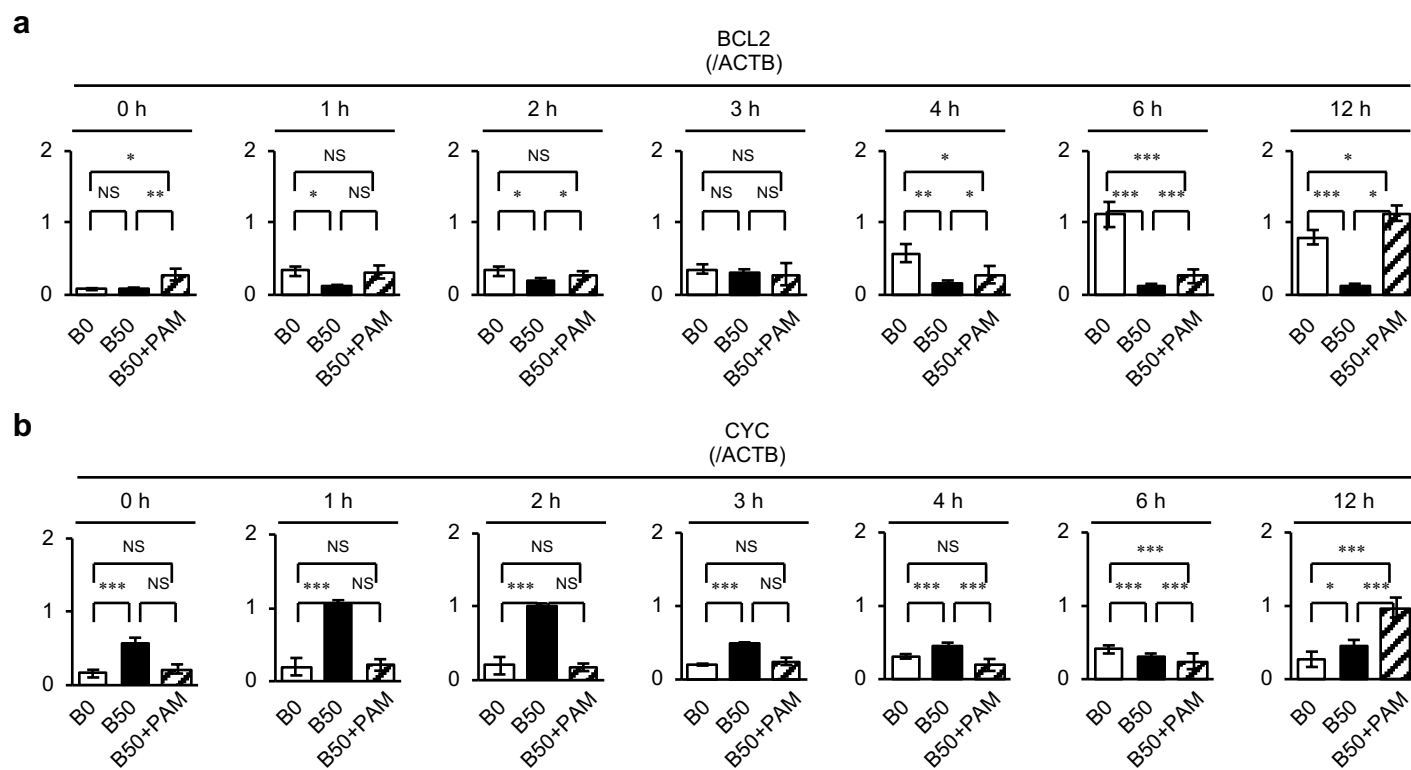

**Supplementary Figure 3. Effects of pamidronate on the kinetics of BCL2 and cytochrome c at each time point in bilirubin-impaired SHED.** Sequential expression of BCL2 and cytochrome c (CYC) by western blot analysis was shown in Figure 2a. Results were shown as the relative expression of BCL2/b-actin (BCL2/ACTB) (**a**) and cytochrome c/b-actin (CYC/ACTB) (**b**) at each time point among the three groups. B0, SHED treated with 0  $\mu$ M bilirubin; B50, SHED treated with 50  $\mu$ M bilirubin; B50+PAM, SHED treated with 50  $\mu$ M bilirubin and 10  $\mu$ M pamidronate.  $n = 5$  for all groups. Statistical analysis was performed as described in the Methods. Graph bars showed the means  $\pm$  SEM. \* $P < 0.05$ , \*\* $P < 0.01$ , and \*\*\* $P < 0.005$ . NS: no significance.
