# Supplementary material
Source: publisher figshare collection journal article supplement (https://springernature.figshare.com/ndownloader/files/13524332)
Supplement: Supplementary file 7 [file 13524332]

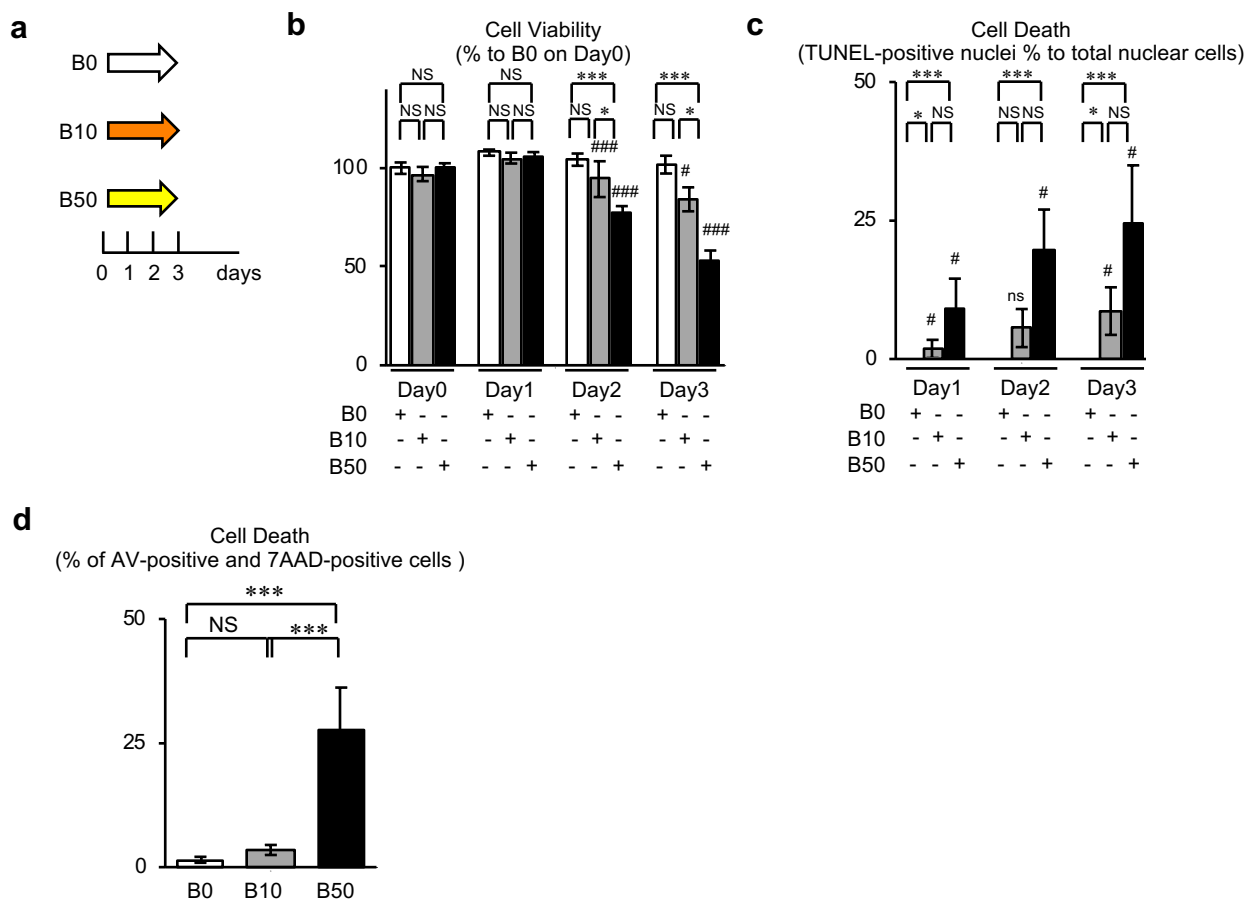

**Supplementary Figure 1.** Bilirubin induces cell death of SHED. **(a)** A scheme of SHED cultures for the cell proliferation and cell death assays. SHED were incubated with bilirubin (0, 10, and 50  $\mu$ M) for 3 days under serum-depleted conditions. **(b)** Cell viability assay. Results were shown as a ratio (%) to the cell viability in B0 on Day 0. **(c)** TUNEL staining assay. Results were shown as a ratio (%) of TUNEL-positive nuclei to total nuclear cells. **(d)** Flow cytometry with Annexin-V (AV) and 7AAD staining. Results were shown as a ratio (%) of AV-positive and 7AAD-positive. **a–d:** B0: group treated with 0  $\mu$ M bilirubin; B10: group treated with 10  $\mu$ M bilirubin; B50: group treated with 50  $\mu$ M bilirubin. **b–d:**  $n=5$  for all groups. Statistical analysis was performed as described in the Methods. Graph bars showed the means  $\pm$  SEM.  $*P < 0.05$  and  $***P < 0.005$ . NS, no significance. **b, c:**  $\#P < 0.05$  and  $###P < 0.005$  vs. B0 on Day 0. ns, no significance vs. B0 on Day 0.
